# Supplementary material for: Evaluating Prevalence and Patterns of Prescribing Medications for Depression for Patients With Obesity Using Large Primary Care Data (Canadian Primary Care Sentinel Surveillance Network)
Source: PubMed Central journal article supplement (PMC7090027; doi:10.3389/fnut.2020.00024), 2020-03-17
Supplement: Table_1.pdf [file Table_1.pdf]

**Supplementary Table 1.** Antidepressant medications included in the analysis.

| Medications for depression                                       |                                                                                                        |
|------------------------------------------------------------------|--------------------------------------------------------------------------------------------------------|
| Class                                                            | Type                                                                                                   |
| Selective Serotonin Reuptake Inhibitors (SSRI)                   | Escitalopram, citalopram, sertraline, fluoxetine, paroxetine, fluvoxamine                              |
| Serotonin-norepinephrine reuptake inhibitors (SNRI)              | Venlafaxine, duloxetine, desvenlafaxine                                                                |
| Tricyclic antidepressants (TCA)                                  | Amitriptyline, nortriptyline, doxepin, imipramine, clomipramine, desipramine, trimipramine, amoxapine, |
| Tetracyclic antidepressant                                       | Maprotiline                                                                                            |
| Norepinephrine and specific serotonergic antidepressants (NaSSA) | Mirtazapine                                                                                            |
| Norepinephrine-dopamine reuptake inhibitors (NDRI)               | Bupropion                                                                                              |
| Serotonin antagonist reuptake inhibitors (SARI)                  | Trazodone, nefazodone, vilazodone, vortioxetine                                                        |
| Second-generation “atypical” antipsychotic                       | Quetiapine                                                                                             |
| Irreversible Monoamine oxidase (MAO) inhibitors                  | Phenelzine, tranylcypromine                                                                            |
| Reversible inhibitor of MAO-A                                    | Moclobemide                                                                                            |
