# Supplementary material for: Evaluating Prevalence and Patterns of Prescribing Medications for Depression for Patients With Obesity Using Large Primary Care Data (Canadian Primary Care Sentinel Surveillance Network)
Source: PubMed Central journal article supplement (PMC7090027; doi:10.3389/fnut.2020.00024), 2020-03-17
Supplement: Table_2.pdf [file Table_2.pdf]

**Supplementary Table 2.** Characteristics of patients prescribed AD, according to weight categories

|                             | Weight category                    |                                     |                                     |                                  | Total<br>N=63,830<br>n (%)          |
|-----------------------------|------------------------------------|-------------------------------------|-------------------------------------|----------------------------------|-------------------------------------|
|                             | Underweight,<br>N=1,685 (2.6%)     | Normal weight<br>N=23,188 (36.3%)   | Overweight<br>N=19,643 (30.8%)      | Obese<br>N=19,314 (30.3%)        |                                     |
|                             | AD+<br>N=1,077<br>(63.9%)<br>n (%) | AD+<br>N=14,476<br>(62.4%)<br>n (%) | AD+<br>N=12,684<br>(64.6%)<br>n (%) | AD+<br>N=13,369 (69.2%)<br>n (%) | AD+<br>N=41,606<br>(65.2%)<br>n (%) |
| Age                         |                                    |                                     |                                     |                                  |                                     |
| mean (SD)                   | 33.4 (17.5)                        | 39.0(16.5)                          | 44.0 (16.0)                         | 42.8 (14.8)                      | 41.6(16.0)                          |
| median (IQR)                | 26.0 (22.1)                        | 35.7 (25.4)                         | 43.0 (23.5)                         | 41.6 (21.6)                      | 39.9(24.2)                          |
| Gender                      |                                    |                                     |                                     |                                  |                                     |
| Men                         | 238 (22.1)                         | 3535 (24.4)                         | 4,522 (35.7)                        | 4,078 (30.5)                     | 12,373(29.7)                        |
| Women                       | 839 (77.9)                         | 10,941 (75.6)                       | 8,162 (64.4)                        | 9,291 (69.5)                     | 29,233(70.3)                        |
| BMI,<br>first measure       |                                    |                                     |                                     |                                  |                                     |
| mean (SD)                   | 17.4 (0.8)                         | 22.2 (1.7)                          | 27.3 (1.4)                          | 36.2 (6.2)                       | 28.1(7.1)                           |
| median (IQR)                | 17.6 (1.2)                         | 22.4 (2.8)                          | 27.2 (2.5)                          | 34.3 (6.7)                       | 26.8(8.4)                           |
| Comorbidities               |                                    |                                     |                                     |                                  |                                     |
| At least one<br>comorbidity | 110(10.2)                          | 1,665(11.5)                         | 2,129(16.8%)                        | 3,353(25.08)                     | 7257(17.4)                          |
| COPD                        | 31 (2.9)                           | 306 (2.1)                           | 279 (2.2)                           | 407 (3.0)                        | 1023(2.5)                           |
| Dementia                    | 17 (1.6)                           | 177 (1.2)                           | 214 (1.7)                           | 188 (1.4)                        | 596(1.4)                            |
| Diabetes                    | 14 (1.3)                           | 273 (1.9)                           | 496 (3.9)                           | 1247 (9.3)                       | 2030(4.9)                           |
| Epilepsy                    | 45 (4.2)                           | 582 (4.0)                           | 577 (4.6)                           | 769 (5.8)                        | 1973(4.7)                           |
| Hypertension                | 34 (3.2)                           | 672 (4.6)                           | 1,220 (9.6)                         | 2,041 (15.3)                     | 3967(9.5)                           |
| Osteoarthritis              | 17 (1.6)                           | 372 (2.6)                           | 538 (4.2)                           | 903 (6.8)                        | 1830(4.4)                           |
| Parkinson                   | 2 (0.2)                            | 35 (0.2)                            | 37 (0.3)                            | 29 (0.2)                         | 103(0.25)3                          |

AD: antidepressant medications; BMI: Body mass Index
