# Supplementary material for: Evaluating Prevalence and Patterns of Prescribing Medications for Depression for Patients With Obesity Using Large Primary Care Data (Canadian Primary Care Sentinel Surveillance Network)
Source: PubMed Central journal article supplement (PMC7090027; doi:10.3389/fnut.2020.00024), 2020-03-17
Supplement: Table_3.pdf [file Table_3.pdf]

**Table 3.** Univariable and multivariable logistic regression analyses of the association between patient’s weight category and AD prescribing among CPCSSN patients with depression, adjusted for clustering with Networks as clusters. MICE analysis

| Variables    | Weight Category     | Logistic regression, unadjusted to network ID |            |      |            | Mixed effects model with adjustment for clustering** |            |
|--------------|---------------------|-----------------------------------------------|------------|------|------------|------------------------------------------------------|------------|
|              |                     | cOR                                           | 95% CI     | aOR* | 95% CI     | aOR*                                                 | 95% CI     |
| Weight group | Normal weight (Ref) | 1                                             | -          | 1    | -          | 1                                                    | -          |
|              | Obese               | 1.20                                          | 1.14, 1.26 | 1.14 | 1.08, 1.21 | 1.13                                                 | 1.07, 1.19 |
|              | Overweight          | 1.07                                          | 1.03, 1.11 | 1.04 | 1.00, 1.08 | 1.03                                                 | 0.99, 1.08 |
|              | Underweight         | 1.04                                          | 0.93, 1.15 | 1.05 | 0.94, 1.16 | 1.03                                                 | 0.93, 1.15 |
| Sex          | Women (Ref)         | 1                                             | -          | 1    | -          | 1                                                    | -          |
|              | Men                 | 1.02                                          | 0.99, 1.04 | 0.98 | 0.95, 1.00 | 0.98                                                 | 0.95, 1.00 |
| Age (years)  | 18-25 (Ref)         | 1                                             | -          | 1    | -          | 1                                                    | -          |
|              | 25-35               | 1.07                                          | 1.03, 1.11 | 1.04 | 1.00, 1.08 | 1.06                                                 | 1.02, 1.10 |
|              | 35-45               | 1.09                                          | 1.05, 1.13 | 1.02 | 0.98, 1.06 | 1.05                                                 | 1.01, 1.09 |
|              | 45-55               | 1.14                                          | 1.10, 1.19 | 1.02 | 0.98, 1.07 | 1.04                                                 | 1.00, 1.08 |
|              | 55-65               | 1.24                                          | 1.18, 1.30 | 0.98 | 0.95, 1.05 | 1.01                                                 | 0.96, 1.06 |
|              | >65                 | 1.71                                          | 1.63, 1.81 | 1.11 | 1.05, 1.18 | 1.09                                                 | 1.03, 1.16 |

AD: antidepressant medications; cOR: crude odds ratio; aOR: adjusted odds ratio; 95% CI: 95% confidence intervals; MICE: multiple imputations by chained equations

\*Adjusted also for the following comorbidities: hypertension, diabetes, epilepsy, osteoarthritis, COPD, Parkinson disease, and dementia; \*\*adjusted for clustering by networks
