# Supplementary material for: Evaluating Prevalence and Patterns of Prescribing Medications for Depression for Patients With Obesity Using Large Primary Care Data (Canadian Primary Care Sentinel Surveillance Network)
Source: PubMed Central journal article supplement (PMC7090027; doi:10.3389/fnut.2020.00024), 2020-03-17
Supplement: Table_4.pdf [file Table_4.pdf]

**Supplementary Table 4.** Univariable and multivariable regression analyses of the association between obesity class and prescribing of AD among CPCSSN patients with depression and obesity. MICE analysis

| Variables    | Obesity class | Logistic regression,<br>unadjusted to network ID |            |      |            | Mixed effects model with<br>adjustment for<br>clustering** |            |
|--------------|---------------|--------------------------------------------------|------------|------|------------|------------------------------------------------------------|------------|
|              |               | cOR                                              | 95%CI      | aOR* | 95%CI      | aOR*                                                       | 95%CI      |
| Weight group | Class I (Ref) | 1                                                | -          | 1    | -          | -                                                          | -          |
|              | Class II      | 1.12                                             | 1.04, 1.19 | 1.09 | 1.02, 1.17 | 1.08                                                       | 1.01, 1.16 |
|              | Class III     | 1.11                                             | 1.02, 1.21 | 1.05 | 0.95, 1.16 | 1.03                                                       | 0.93, 1.13 |
| Sex          | Women (Ref)   | 1                                                | -          | 1    | -          | -                                                          | -          |
|              | Men           | 1.01                                             | 0.95, 1.07 | 0.98 | 0.92, 1.03 | 0.98                                                       | 0.93, 1.03 |
| Age (years)  | 18-25 (Ref)   | 1                                                | -          | 1    | -          | 1                                                          | -          |
|              | 25-35         | 1.13                                             | 1.00, 1.27 | 1.10 | 0.98, 1.23 | 1.11                                                       | 0.99, 1.24 |
|              | 35-45         | 1.12                                             | 1.00, 1.26 | 1.06 | 0.94, 1.19 | 1.08                                                       | 0.96, 1.22 |
|              | 45-55         | 1.19                                             | 1.07, 1.32 | 1.04 | 0.93, 1.16 | 1.05                                                       | 0.94, 1.17 |
|              | 55-65         | 1.32                                             | 1.16, 1.49 | 1.02 | 0.94, 1.22 | 1.02                                                       | 0.89, 1.17 |
|              | >65           | 1.71                                             | 1.52, 1.93 | 1.07 | 0.92, 1.04 | 1.05                                                       | 0.92, 1.19 |

AD: antidepressants; cOR: crude odds ratio; aOR: adjusted odds ratio; 95% CI: 95% confidence intervals; MICE: multiple imputations by chained equations

\*Also adjusted to comorbidities; \*\*adjustment for clustering by networks
